# Supplementary material for: Geometric Model of a Coastal Aquifer to Promote the Sustainable Use of Water. Manglaralto, Ecuador
Source: MDPI journal article supplement (doi:10.3390/w13070923), 2021-03-28

## SUPPLEMENTARY MATERIALS

Article

# Geometric model of a coastal aquifer to promote the sustainable use of water. Manglaralto, Ecuador.

Supplementary Materials:

**Figure S 1:** Map of the geology of the area, in which the location of the SEVs carried out is detailed.

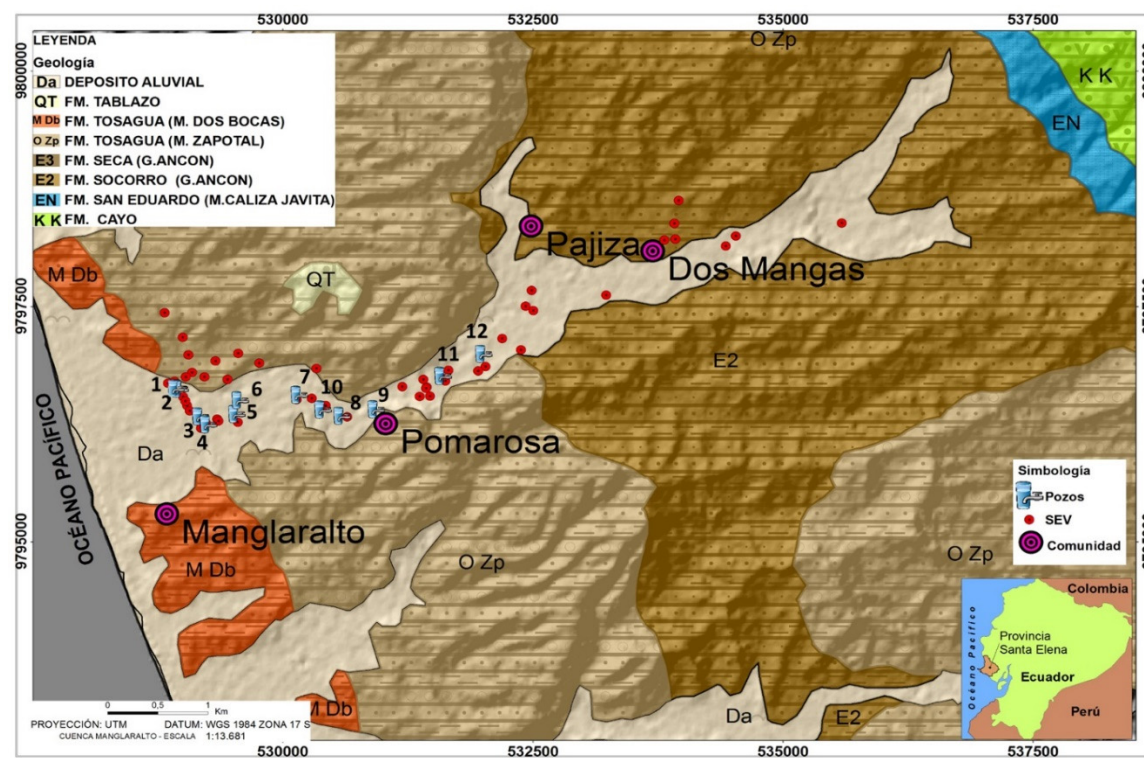

Supplement: s1 [file s1]
